# Supplementary material for: Effect of the Non-Immunosuppressive MPT Pore Inhibitor Alisporivir on the Functioning of Heart Mitochondria in Dystrophin-Deficient mdx Mice
Source: MDPI journal article supplement (doi:10.3390/biomedicines9091232), 2021-09-16
Supplement: s1 [file s1]

## Supplementary Material: Effect of the Non-immunosuppressive MPT pore Inhibitor Alisporivir on the Functioning of Heart Mitochondria in Dystrophin-deficient *mdx* Mice

Mikhail V. Dubinin <sup>1,\*</sup>, Vlada S. Starinets <sup>1,2</sup>, Eugeny Yu. Talanov <sup>2</sup>, Irina B. Mikheeva <sup>2</sup>, Natalia V. Belosludtseva <sup>2</sup>, Dmitriy A. Serov <sup>3</sup>, Kirill S. Tenkov <sup>1</sup>, Evgeniya V. Belosludtseva <sup>1</sup>, and Konstantin N. Belosludtsev <sup>1,2</sup>

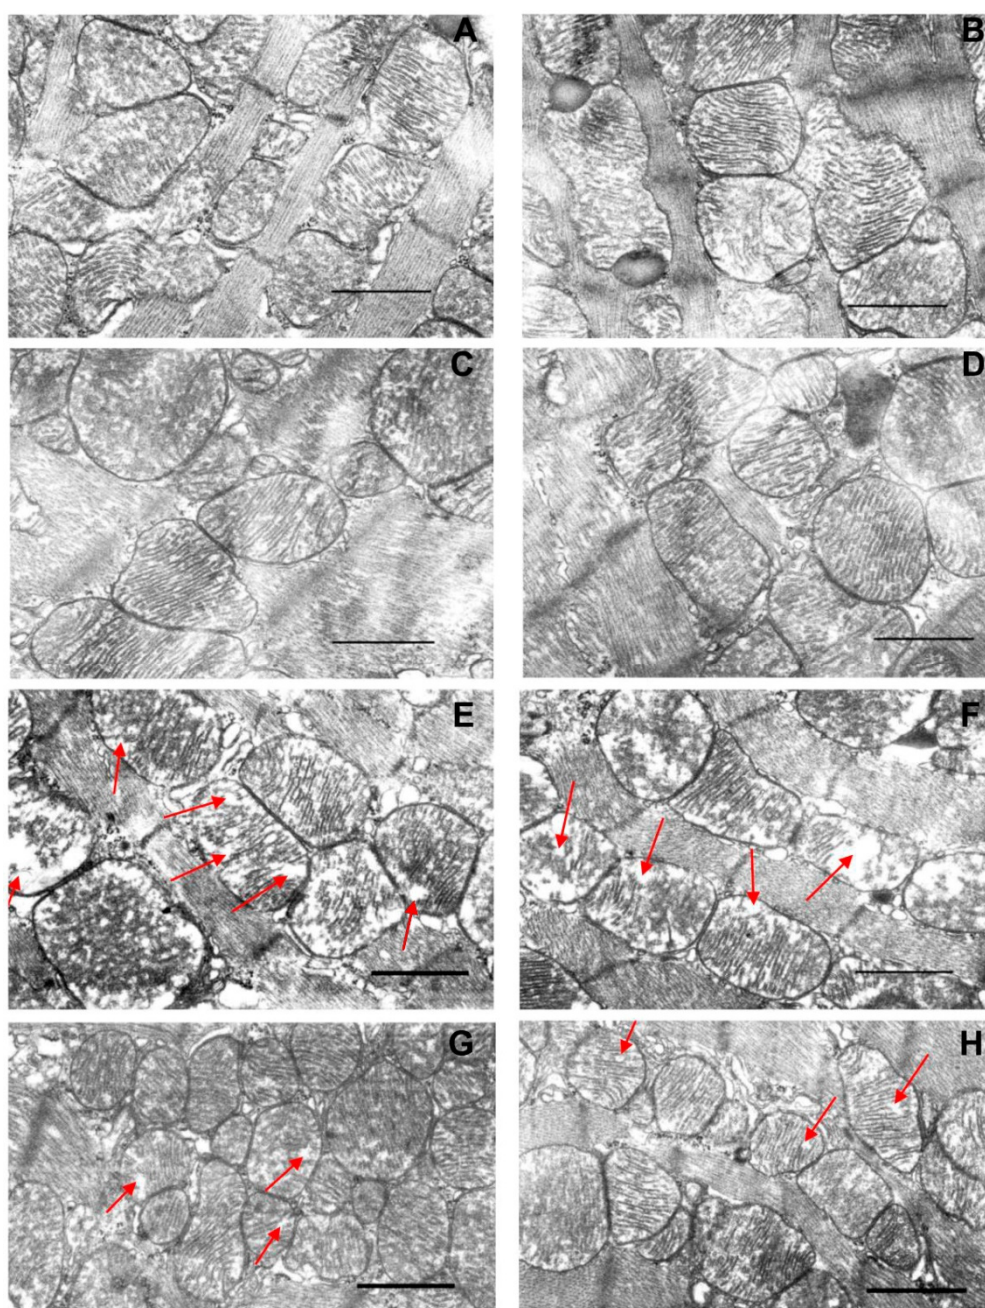

**Figure S1.** Typical electron micrographs of left ventricular mitochondria in the experimental groups: WT (A,B), WT+Ali (C,D), *mdx* (E,F) and *mdx*+Ali (G,H). Samples from two hearts were analyzed in each experimental group. The bar is equal to 1  $\mu$ m. Red arrows indicate individual abnormal mitochondria.
